# Supplementary material for: Recent allopolyploidy alters Spartina microRNA expression in response to xenobiotic-induced stress
Source: Springer Nature journal article supplement (doi:10.1007/s11103-022-01328-y), 2022-12-29
Supplement: MOESM1 [file 11103_2022_1328_MOESM1_ESM.pdf]

## Supplementary Information for:

### Recent allopolyploidy alters *Spartina* microRNA expression in response to xenobiotic-induced stress.

Authors: Armand Cavé-Radet<sup>1</sup>, Armel Salmon<sup>1</sup>, Loup Tran Van Canh<sup>1</sup>, Richard L. Moyle<sup>2</sup>, Lara-Simone Pretorius<sup>2</sup>, Oscar Lima<sup>1</sup>, Malika L. Ainouche<sup>1</sup> and Abdelhak El Amrani<sup>1</sup>

<sup>1</sup>Université de Rennes 1, UMR CNRS 6553, Ecosystèmes-Biodiversité-Evolution, OSUR, Campus de Beaulieu, Bâtiment 14A, 35042 Rennes cedex, France.

<sup>2</sup>Nexgen Plants Pty Ltd., School of Agriculture and Food Sciences, University of Queensland, Brisbane, QLD, Australia

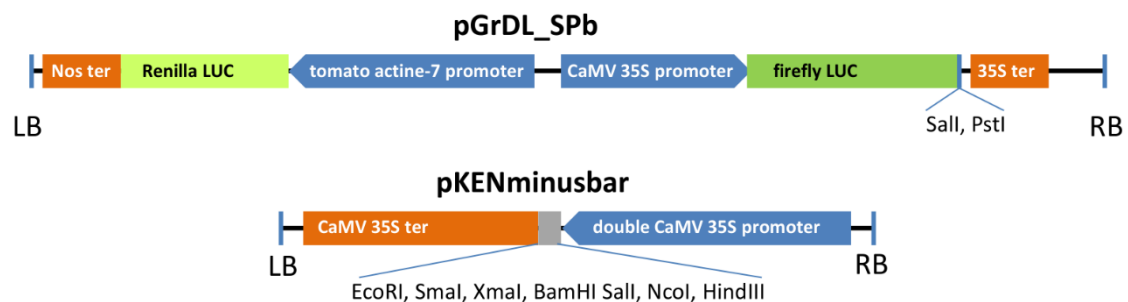

**Figure S1. Plasmids used for transient assay systems to validate computationally predicted targets of miRNAs.** The plasmid pGrDL\_SPb contains the *Renilla* LUC expression cassette which acts as an internal control to standardize expression between replicates, while the *Firefly* LUC expression cassette containing the predicted target sequence cloned between *Sall* and *PstI* is used to report miRNA interaction. Expression plasmid pKENminusbar with multiple cloning sites is used for miRNA precursor insertion.

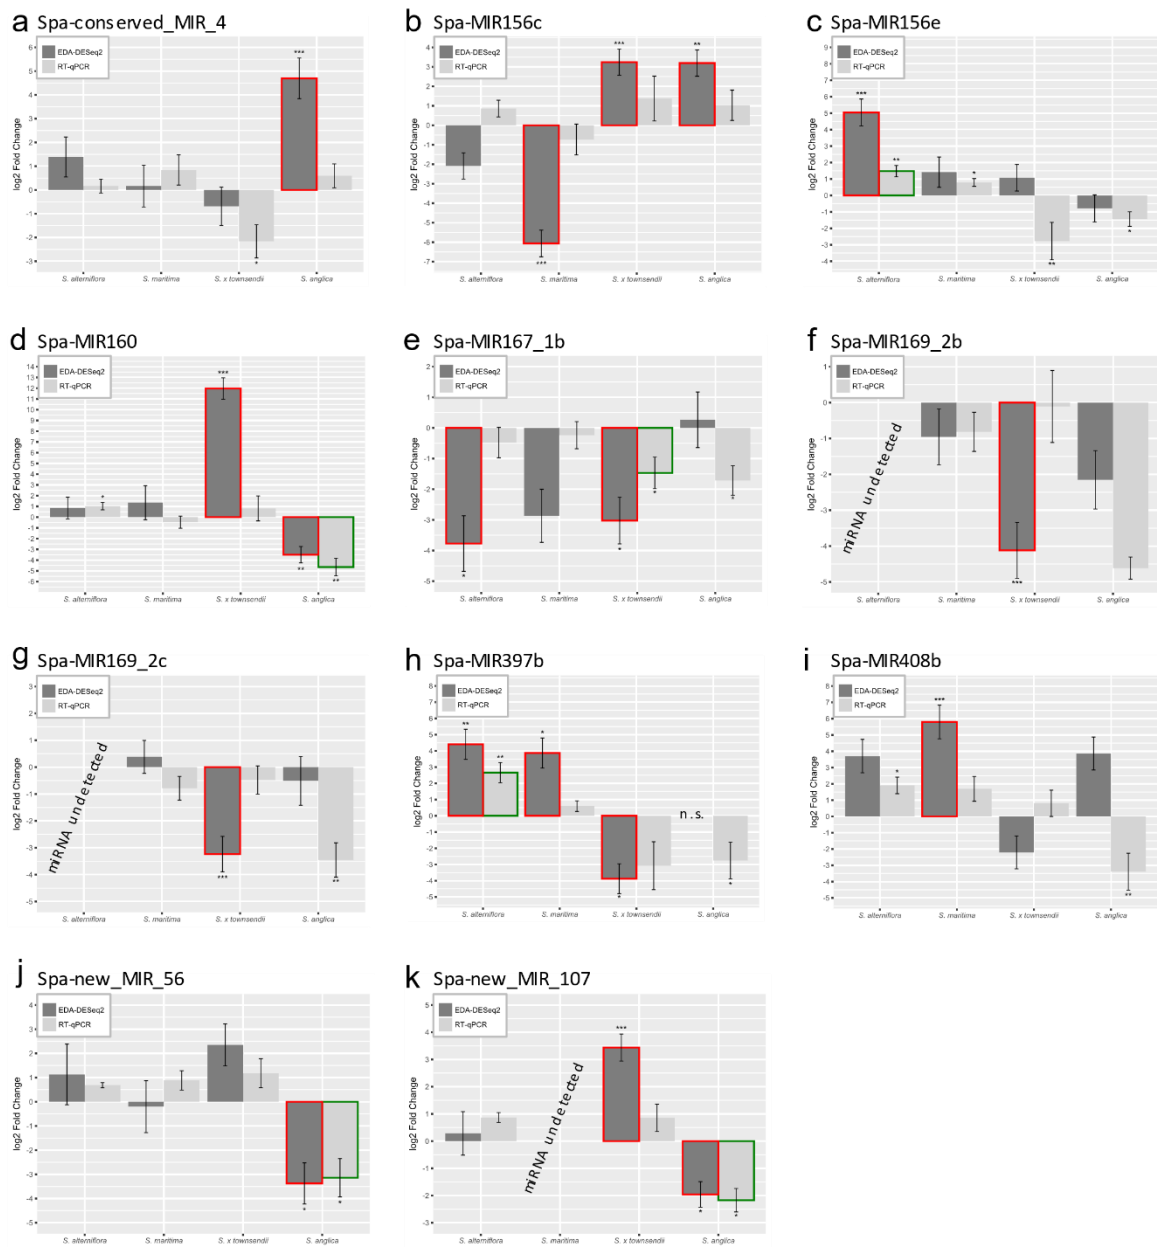

**Figure S2. Expression patterns obtained for 11 miRNAs in response to phe within *Spartina* species.** On this subset of 11 miRNAs, we compared miRNA expression patterns (log<sub>2</sub> Fold Changes ± SE) from intraspecific comparisons of phe-treated versus control libraries within *Spartina* species, as estimated by the *in-silico* (EDAseq-DESeq2; dark grey) and the RT-qPCR approaches (light grey). Significant differences in miRNA expression patterns were reported for 18 comparisons using EDAseq-DESeq2 (bars surrounded in red). Using RT-qPCR, we confirmed significant differences in miRNA expression patterns for 6 comparisons (bars surrounded in green). MicroRNA expressions patterns measured *in silico* are significantly DE according to DESeq2 Bonferroni adjusted p.value, while miRNA expressions patterns measured by RT-qPCR are significantly DE according to Wilcoxon signed rank tests (\*: p.value < 0.05; \*\*: p.value < 0.01; \*\*\*: p.value < 0.001).

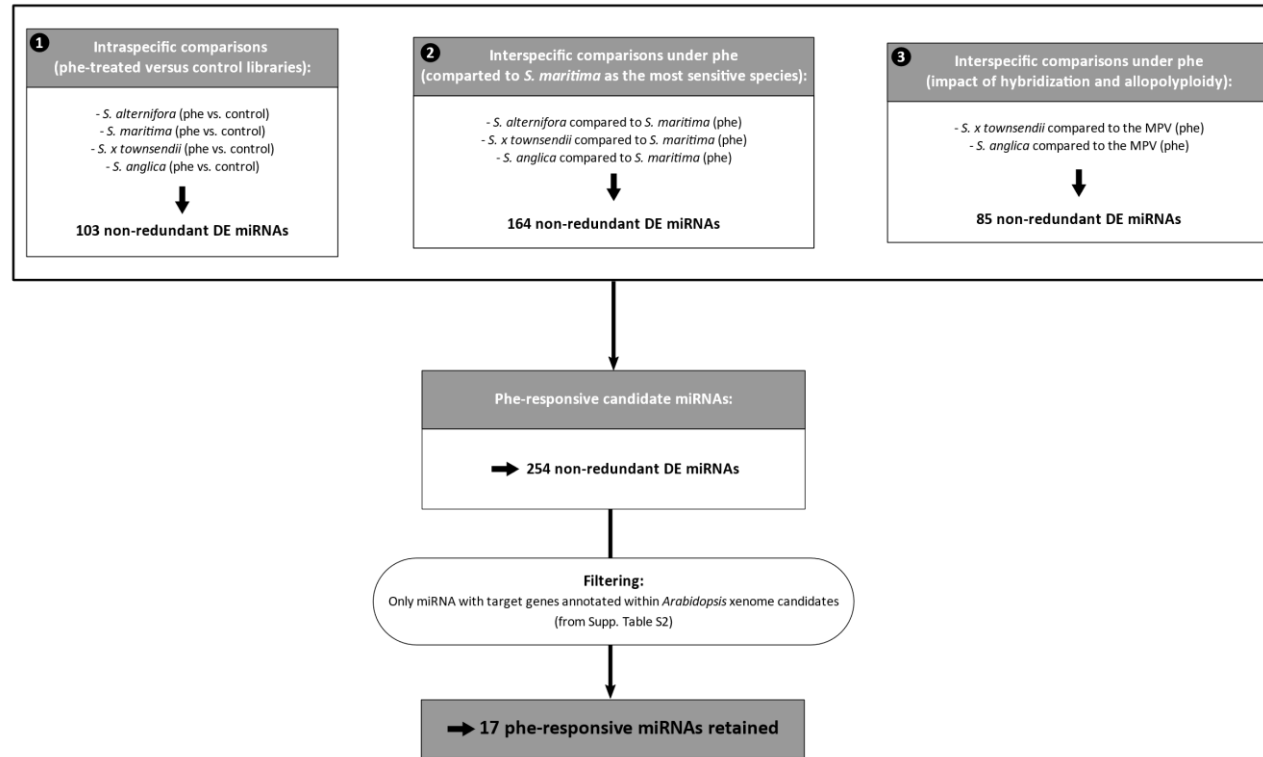

**Figure S3. Identification process of phe-responsive miRNAs in *Spartina*.** From the *in silico* differential expression analysis, (1) 103 non-redundant phe-responsive candidate miRNAs were identified from intraspecific comparisons (phe-treated versus control). In complement, we also analysed (2) DE miRNAs from pairwise interspecific comparisons under phe (*S. alterniflora* compared to *S. maritima*, *S. x townsendii* compared to *S. maritima*, and *S. anglica* compared to *S. maritima*) to detect additional phe-responsive candidate miRNAs, representing 164 non-redundant miRNAs. Finally, we also included (3) DE miRNAs by comparing *S. x townsendii* and *S. anglica* to the MPV under phe as additional phe-responsive candidate miRNAs, representing in total 85 non-redundant miRNAs. When combining the differential expression analyses, phe-responsive candidate miRNAs represent 254 non-redundant miRNAs. Finally, only miRNAs with target genes annotated within *Arabidopsis* xenome candidates were retained, which represent 17 *Spartina* phe-responsive miRNAs.

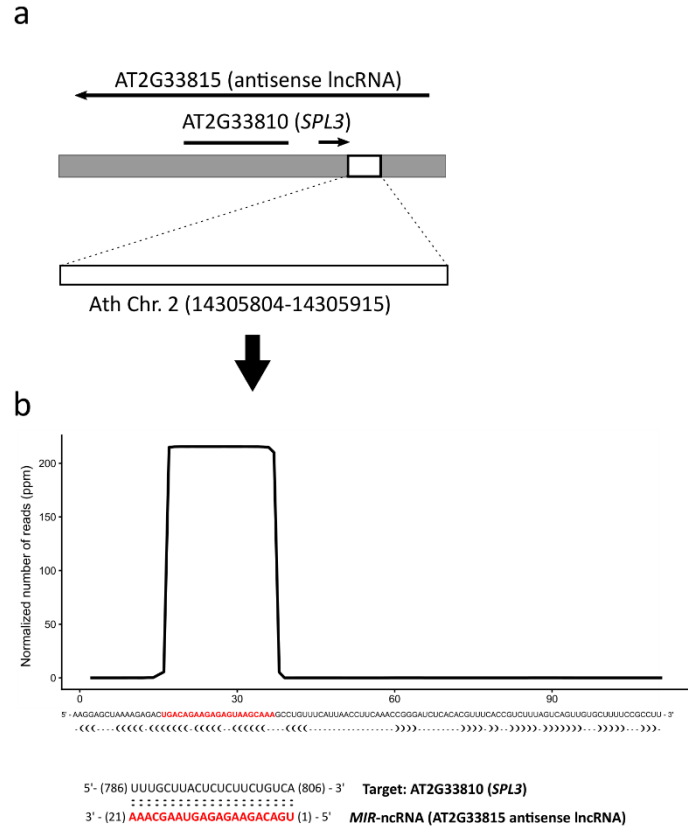

**Figure S4. *De novo* prediction of a putative primary *MIR156* transcript in *Arabidopsis* (*MIR*-ncRNA) homologous to *Spa-MIR156e* and *Spa-MIR156j*.** This putative *MIR156* primary transcript (a) was identified following mapping of *Spartina* miRNAs on the *Arabidopsis* genome in the lncRNA AT2G33815 (Chr. 2 positions 14305804 to 14305915). This putative miRNA precursor presents a stem-loop design (b), producing a *MIR156* candidate (in red) predicted to target *SPL3* by perfect matching with the opposite complementary strand.

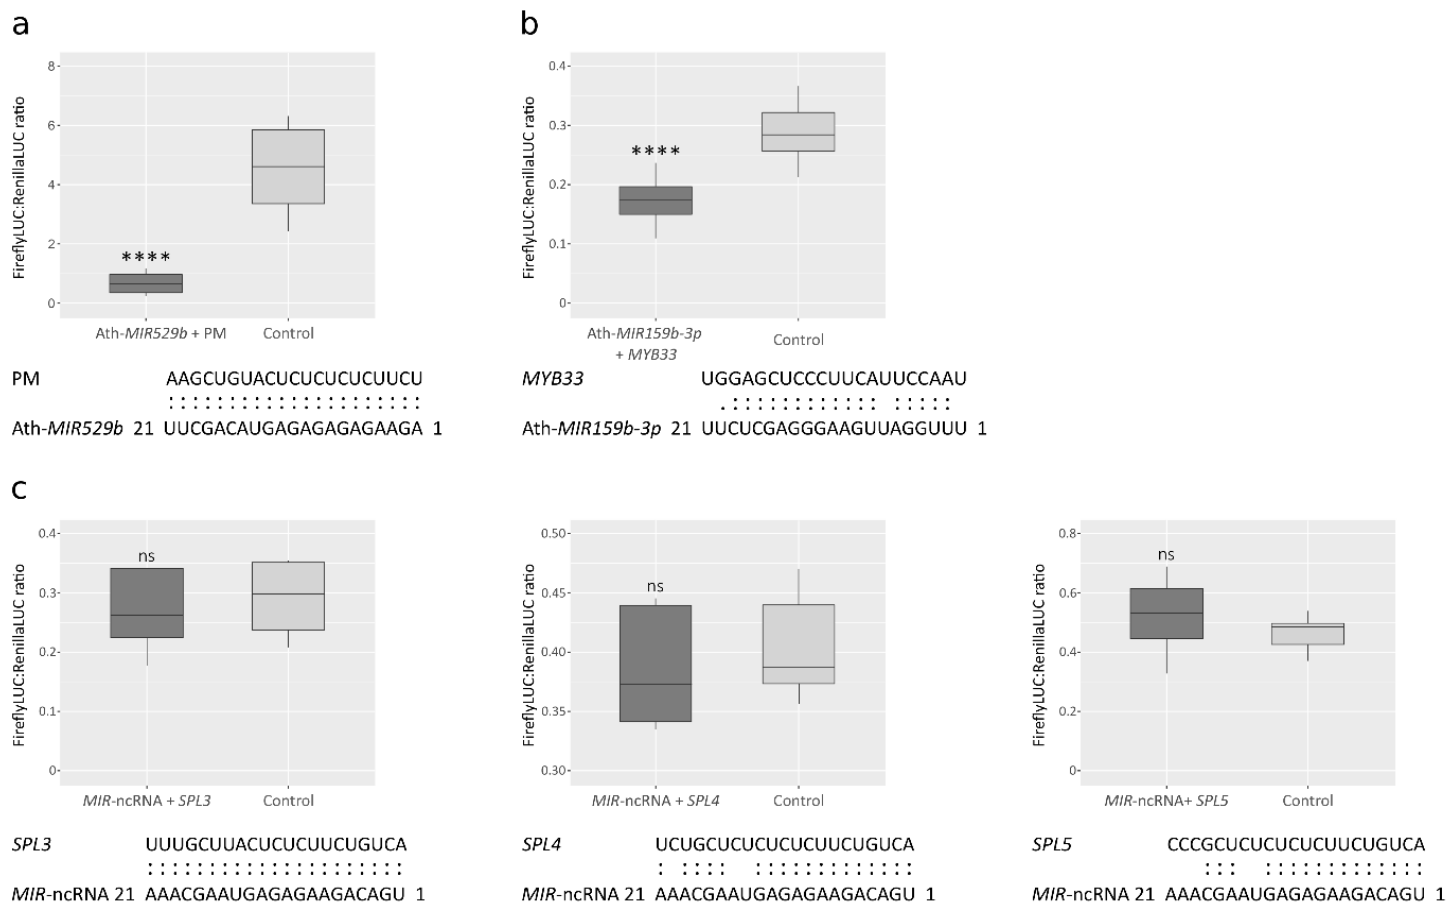

**Figure S5. Additional experimental validation by dual LUC assay of computational interactions of *Arabidopsis* miRNAs (homologous to phen-responsive miRNAs in *Spartina*) and their predicted targets.** We used the same a positive control as presented in Fig. 5 (a). Interactions tested are Ath-MIR159-3p with target gene MYB33 domain protein (AT5G06100) (b) and MIR-ncRNA with target genes SPL3: SQUAMOSA PROMOTER BINDING PROTEIN-LIKE 3 (AT2G33810), SPL4 (AT1G53160) and SPL5 (AT3G15270) (c). Data were depicted as box and whisker plots with interquartile range boxes and min/max whiskers (n=6). Asterisks represent statistically significant differences using a simple two-tailed unpaired *t*-test with \*\*\*\*p.value < 0.0001.

**Table S1. Pairwise comparisons between treatments and species performed for miRNA differential expression analysis.** This table classifies intraspecific and interspecific comparisons performed, and reminds how phe-responsive candidate miRNAs and miRNAs impacted by allopolyploidy under phe exposure were respectively identified.

|                           |                                                             | Phe-responsive candidate miRNAs | Impact of allopolyploidy on miRNAs under phe |
|---------------------------|-------------------------------------------------------------|---------------------------------|----------------------------------------------|
| Intraspecific comparisons | <i>S. alterniflora</i> (phe vs. control)                    | x                               |                                              |
|                           | <i>S. maritima</i> (phe vs. control)                        | x                               |                                              |
|                           | <i>S. x townsendii</i> (phe vs. control)                    | x                               |                                              |
|                           | <i>S. anglica</i> (phe vs. control)                         | x                               |                                              |
| Interspecific comparison  | <i>S. alterniflora</i> compared to <i>S. maritima</i> (phe) | x                               |                                              |
|                           | <i>S. x townsendii</i> compared to <i>S. maritima</i> (phe) | x                               |                                              |
|                           | <i>S. anglica</i> compared to <i>S. maritima</i> (phe)      | x                               |                                              |
|                           |                                                             |                                 |                                              |
|                           | <i>S. x townsendii</i> compared to the MPV (phe)            | x                               | x (impact of hybridization)                  |
|                           | <i>S. anglica</i> compared to the MPV (phe)                 | x                               | x (impact of allopolyploidy)                 |
|                           | <i>S. anglica</i> compared to <i>S. x townsendii</i> (phe)  |                                 | x (impact of genome doubling <i>per se</i> ) |

**Table S2. TAIR10 gene families potentially involved in xenobiotic detoxification.** It includes xenome genes (Edwards *et al.*, 2011), or genes annotated as antioxidants enzymes and transcription factors (TFs) (<https://www.arabidopsis.org/browse/genefamily/index.jsp>).

[Excel file submitted separately]

**Table S3. Primers used for RT-qPCR of Spa-miRNAs.** The poly(T) adaptor used in reverse transcription of polyadenylated RNA is provided, as well as the universal poly(T) reverse primer sequence.

|                          | Primer sequence                                 |
|--------------------------|-------------------------------------------------|
| poly(T)_adaptor          | GCGAGCACAGAATTAATACGACTCACTATAGGTTTTTTTTTTTTTVN |
| poly(T)_adaptor_RP       | GCGAGCACAGAATTAATACGAC                          |
| Spa-new_MIR_25 (rRNA 5s) | AAGTCCTCGTGTGCATCCCT                            |
| Spa-MIR156c              | TTGACAGAAGATAGAGAGCAC                           |
| Spa-MIR156e              | TGACAGAAGAGAGTGAGCACA                           |
| Spa-MIR397b              | TTGAGTGCAGCGTTGATGAAA                           |
| Spa-MIR408b              | CTGCACTGCCTCTTCCCT                              |
| Spa-MIR169_2b            | ATCGGCAAGTTGTCCTTG                              |
| Spa-MIR169_2c            | TGCAGCCAAGGATGACTTGCC                           |
| Spa-MIR167_1b            | TGAAGCTGCCAGCATGATCTA                           |
| Spa-MIR160               | GTGCAAGGGGCCAAGCAT                              |
| Spa-conserved_MIR_4      | AAACCTGGCTCTGATACCA                             |
| Spa-new_MIR_56           | GCTCTGAAATTGTTGTCATTAGG                         |
| Spa-new_MIR_107          | ATTGGTATCGGCTGATGTAAG                           |

**Table S4. Primers used to construct target site adaptors in the plasmid pGrDL\_SPb for dual LUC assays.** Plasmid pGrDL\_SPb with *Sall* and *PstI* restriction sites is used for target sequence insertion.

| Primer Name                       | Primer Sequence                                |
|-----------------------------------|------------------------------------------------|
| Ath-MIR529b_PM_F                  | <u>TCGACGCCCAAAGCTGTACTCTCTCTTCTCCATTCTGCA</u> |
| Ath-MIR529b_PM_R                  | GAATGGAGAAGAGAGAGAGTACAGCTTTGGGCG              |
| AT5G06100, MYB33_domain_protein_F | <u>TCGACTGGAGCTCCCTTCATTCCAATCTGCA</u>         |
| AT5G06100, MYB33_domain_protein_R | GATTGGAATGAAGGGAGCTCCAG                        |
| AT5G43270, SPL2_F                 | <u>TCGACGTGCTCTCTCTTCTGTCACTGCA</u>            |
| AT5G43270, SPL2_R                 | GTGACAGAAGAGAGAGAGCACG                         |
| AT2G33810, SPL3_F                 | <u>TCGACTTTGCTTACTCTCTTCTGTCACTGCA</u>         |
| AT2G33810, SPL3_R                 | GTGACAGAAGAGAGTAAGCAAAG                        |
| AT1G53160, SPL4_F                 | <u>TCGACTCTGCTCTCTCTTCTGTCACTGCA</u>           |
| AT1G53160, SPL4_R                 | GTGACAGAAGAGAGAGAGCAGAG                        |
| AT3G15270, SPL5_F                 | <u>TCGACCCCGCTCTCTCTTCTGTCACTGCA</u>           |
| AT3G15270, SPL5_R                 | GTGACAGAAGAGAGAGAGCGGGG                        |
| AT5G50670, SPL13B_F               | <u>TCGACCTTCTCTTTCTTTTTTTCACTGCA</u>           |
| AT5G50670, SPL13B_R               | GTGAAAAAAAAAGAAAGAGAAGG                        |

**Table S5. Summary of small RNA-seq data processing in *Spartina*.** Number of reads retained on each *Spartina* species for control and phe-treated libraries are presented.

| Species                             | <i>S. alterniflora</i> |            | <i>S. maritima</i> |            | <i>S. x townsendii</i> |             | <i>S. anglica</i> |            |
|-------------------------------------|------------------------|------------|--------------------|------------|------------------------|-------------|-------------------|------------|
|                                     | Control                | PHE        | Control            | PHE        | Control                | PHE         | Control           | PHE        |
| Raw reads                           | 37,551,835             | 60,444,313 | 17,828,306         | 32,274,148 | 100,752,127            | 125,380,090 | 46,650,696        | 39,620,672 |
| Clean reads                         | 22,231,291             | 31,443,611 | 11,042,707         | 21,336,208 | 73,548,538             | 97,497,156  | 35,270,284        | 25,825,213 |
| Putative sRNA reads                 | 5,718,925              | 7,367,871  | 3,389,799          | 4,676,878  | 25,809,487             | 52,366,512  | 20,524,897        | 9,612,503  |
| Putative sRNA reads (non-redundant) | 2,252,788              | 2,284,748  | 1,613,905          | 1,853,687  | 7,238,893              | 9,208,854   | 4,434,910         | 2,723,926  |

**Table S6. *Spartina* annotated target genes of DE miRNAs in response to hybridization and allopolyploidy.**

[Excel file submitted separately]



**Table S7. *Spartina* miRNAs and homologous *MIR* genes identified in *Arabidopsis*.** In total, 40 homologous *MIR* genes were retained (39 annotated *MIR* genes and 1 *de novo* predicted *MIR* gene from prediction: *MIR*-ncRNA Chr2. 14305804-14305915). Lines in bold are *Arabidopsis* homologous *MIR* genes related to phe-responsive miRNAs retained in *Spartina*, *MIR* genes in grey were tested by functional validation using T-DNA mutant lines.

| Spa_miRNAs                                                      | Ath_miRNAs         | Chr         | prec_start      | prec_stop       |
|-----------------------------------------------------------------|--------------------|-------------|-----------------|-----------------|
| <b>Spa-MIR156c</b>                                              | <b>Ath-MIR157b</b> | <b>Chr1</b> | <b>24921100</b> | <b>24921199</b> |
| <b>Spa-MIR156c</b>                                              | <b>Ath-MIR157c</b> | <b>Chr3</b> | <b>6244500</b>  | <b>6244716</b>  |
| <b>Spa-MIR156c; Spa-MIR156j; Spa-MIR156e</b>                    | <b>Ath-MIR156h</b> | <b>Chr5</b> | <b>22597018</b> | <b>22597112</b> |
| <b>Spa-MIR156e</b>                                              | <b>Ath-MIR156c</b> | <b>Chr4</b> | <b>15415426</b> | <b>15415513</b> |
| <b>Spa-MIR156e</b>                                              | <b>Ath-MIR156d</b> | <b>Chr5</b> | <b>3456632</b>  | <b>3456749</b>  |
| <b>Spa-MIR156e</b>                                              | <b>Ath-MIR156a</b> | <b>Chr2</b> | <b>10676470</b> | <b>10676556</b> |
| <b>Spa-MIR156e; Spa-MIR156c; Spa-MIR156j</b>                    | <b>Ath-MIR157a</b> | <b>Chr1</b> | <b>24913202</b> | <b>24913301</b> |
| <b>Spa-MIR156e; Spa-MIR156j</b>                                 | <b>Ath-MIR156g</b> | <b>Chr2</b> | <b>8412523</b>  | <b>8412612</b>  |
| <b>Spa-MIR156e; Spa-MIR156j</b>                                 | <b>Ath-MIR156f</b> | <b>Chr5</b> | <b>9136123</b>  | <b>9136219</b>  |
| <b>Spa-MIR156e; Spa-MIR156j</b>                                 | <b>Ath-MIR156e</b> | <b>Chr5</b> | <b>3867210</b>  | <b>3867312</b>  |
| <b>Spa-MIR156j; Spa-MIR156e</b>                                 | <b>MIR-ncRNA</b>   | <b>Chr2</b> | <b>14305804</b> | <b>14305915</b> |
| <b>Spa-MIR159d</b>                                              | <b>Ath-MIR159b</b> | <b>Chr1</b> | <b>6220646</b>  | <b>6220841</b>  |
| <b>Spa-MIR159d; Spa-MIR159i</b>                                 | <b>Ath-MIR159c</b> | <b>Chr2</b> | <b>18994638</b> | <b>18994851</b> |
| Spa-MIR159f; Spa-MIR159h                                        | Ath-MIR319b        | Chr5        | 16660468        | 16660642        |
| <b>Spa-MIR159f; Spa-MIR159h; Spa-MIR159d</b>                    | <b>Ath-MIR319c</b> | <b>Chr2</b> | <b>17029707</b> | <b>17029894</b> |
| Spa-MIR159f; Spa-MIR159h; Spa-MIR159i                           | Ath-MIR319a        | Chr4        | 12352955        | 12353133        |
| Spa-MIR160c                                                     | Ath-MIR160c        | Chr5        | 19009093        | 19009184        |
| Spa-MIR166b                                                     | Ath-MIR166e        | Chr5        | 16775519        | 16775664        |
| Spa-MIR166b; Spa-MIR166h; Spa-MIR166k; Spa-MIR166n              | Ath-MIR165b        | Chr4        | 369849          | 369999          |
| Spa-MIR166b; Spa-MIR166h; Spa-MIR166k; Spa-MIR166n              | Ath-MIR165a        | Chr1        | 78927           | 79037           |
| Spa-MIR166h; Spa-MIR166k; Spa-MIR166l; Spa-MIR166n; Spa-MIR166b | Ath-MIR166f        | Chr5        | 17516306        | 17516401        |
| Spa-MIR167_1b                                                   | Ath-MIR167c        | Chr3        | 1306624         | 1306779         |
| Spa-MIR167_1b; Spa-MIR167_1g                                    | Ath-MIR167a        | Chr3        | 8108072         | 8108209         |
| Spa-MIR167_1b; Spa-MIR167_1g                                    | Ath-MIR167b        | Chr3        | 23406168        | 23406277        |
| Spa-MIR168f                                                     | Ath-MIR168a        | Chr4        | 10578634        | 10578774        |
| Spa-MIR168f                                                     | Ath-MIR168b        | Chr5        | 18358793        | 18358906        |
| Spa-MIR169_2b; Spa-MIR169_2c                                    | Ath-MIR169d        | Chr1        | 20039495        | 20039583        |
| Spa-MIR169_2c                                                   | Ath-MIR169b        | Chr5        | 8527486         | 8527637         |
| Spa-MIR169_2c                                                   | Ath-MIR169g        | Chr4        | 11483019        | 11483128        |
| Spa-MIR169_2c; Spa-MIR169_2b                                    | Ath-MIR169e        | Chr1        | 20041580        | 20041667        |
| Spa-MIR395d                                                     | Ath-MIR395f        | Chr1        | 26273857        | 26273971        |
| Spa-MIR395d                                                     | Ath-MIR395b        | Chr1        | 9364476         | 9364566         |
| Spa-MIR395d                                                     | Ath-MIR395c        | Chr1        | 9367089         | 9367171         |
| Spa-MIR395d                                                     | Ath-MIR395e        | Chr1        | 26272785        | 26272862        |
| Spa-MIR395d                                                     | Ath-MIR395a        | Chr1        | 9363205         | 9363280         |
| Spa-MIR395d                                                     | Ath-MIR395d        | Chr1        | 26269988        | 26270070        |
| Spa-MIR396                                                      | Ath-MIR396b        | Chr5        | 13611798        | 13611932        |
| Spa-MIR397b                                                     | Ath-MIR397b        | Chr4        | 7878656         | 7878757         |
| Spa-MIR399                                                      | Ath-MIR399c        | Chr5        | 24962485        | 24962598        |
| Spa-MIR408b; Spa-MIR408c                                        | Ath-MIR408         | Chr2        | 19319856        | 19319963        |

**Table S8. Target prediction results of phe-responsive homologous miRNAs in *Arabidopsis*.** Only target genes corresponding to putative xenobiotic stress tolerance regulators are included (psRNATarget maximum expectation score set to 5.0; Dai *et al.*, 2018).

[Excel file submitted separately]

**Table S9. *Spartina* homologous *MIR* genes in *Arabidopsis* and their corresponding T-DNA mutant lines.** *Arabidopsis thaliana* T-DNA insertional mutants were obtained from the SALK and SAIL collections (Colombia control grown counterpart Col-0), and from the FLAG collection (Wassilewskija control grown counterpart Ws). The primers used for genotyping are indicated as LP and RP.

[Excel file submitted separately]

## Note S1. Detailed method followed for the experimental validation of miRNAs and target genes interactions from *A. thaliana* by dual LUC assays.

### • Cloning strategy of miRNAs and target sites

For transient assay systems to validate computationally predicted targets of miRNAs, we used the plasmid pGrDL\_SPb which contains the *Renilla* LUC expression cassette acting as internal control to standardize expression between replicates, while the *Firefly* LUC expression cassette containing the predicted target sequence cloned between *Sall* and *PstI* is used to report miRNA interaction (Supplemental Fig. S1).

Target site adaptors were made by annealing two complementary primers (Supplemental Table S4), synthesized with 5'-phosphate additions and *Sall* and *PstI* overhangs (synthesized by Integrated DNA Technologies). A volume of 10 nmol of each primer were mixed together in 60  $\mu$ L of DNase-free water, heated to 90°C for 5 min. in a water bath and allowed to slowly cool down to room temperature (at a rate of 1 degree per minute). The resulting adaptors were diluted 100-fold prior to directional cloning into a *Sall* and *PstI* digested and Antarctic Phosphatase (New England Biolabs) treated pGrDL\_SPb plasmid, and subsequently verified by Sanger sequencing (Australian Genome Research Facility).

The miRNA precursors were synthesized with flanking restriction enzyme sites (GenScript) and cloned between the double *Cauliflower mosaic virus (CaMV)* 35S promoter and 35S terminator of the expression plasmid pKENminusbar. A similar sized construct, derived from *Capsicum chlorosis* virus, was cloned into pKENminusbar and used as a control (see Moyle *et al.*, 2017). This control sequence is predicted to form a secondary structure similarly to a miRNA precursor but does not contain enough homology to produce small RNA capable of interacting with the reporter gene target sequence.

### • Agroinfiltration of *Nicotiana benthamiana* leaves

Agroinfiltration of expression plasmids was carried out as described by Moyle *et al.* (2017) with minor modifications. Expression plasmids were transformed by electroporation into *A. tumefaciens* strain GV3101 (harboring pSOUP) and plated on LB agar media with rifampicin (25 mg.mL<sup>-1</sup>), kanamycin (50 mg.mL<sup>-1</sup>), and tetracycline (10 mg.mL<sup>-1</sup>) selection. Starter cultures were prepared by inoculating a single colony in 2 mL of LB with rifampicin, kanamycin and tetracycline selection, and grown overnight at 28°C in a shaking incubator. Starter culture was used to inoculate the working culture (20–50 mL), which was grown overnight under the same media, selection and incubation conditions. Working cultures were harvested by centrifugation at room temperature and 2,400g for 15 min. Cell pellets were resuspended in 10 mM MgCl<sub>2</sub> and the OD600 adjusted to 0.5 prior to the addition of acetosyringone (200 mM). The resulting cell cultures were stored in the dark at room temperature for 4h prior to infiltration. *Nicotiana benthamiana* plants were grown at room temperature with 16h light per day, under LumiBar LED strip lighting (LumiGrow). Seedlings were grown for approximately 3–4 weeks prior to agroinfiltration. For each miRNA and target gene module tested, three expanded leaves per plant were infiltrated by applying pressure on the abaxial surface of the leaf with a disposable 5 mL syringe containing the *Agrobacterium* suspension. Each leaf was treated as a biological replicate. Agroinfiltrated plants were incubated for a specified period (typically 72h) in a growth chamber set to 22°C with 16h light per day. Agroinfiltrated leaves were harvested individually, snap-frozen in liquid nitrogen, powdered using a ball mill tissue-lyser (Retsch), and stored at -80°C prior to measurement by dual LUC assays.

### • Dual LUC assays

Dual LUC assays (*Firefly* LUC / *Renilla* LUC ratios) extracts were prepared using the Dual Luciferase Reporter Assay System kit (Promega). Five mg of powdered tissue was mixed with 100  $\mu$ L of the passive lysis buffer (PLB), and the cellular debris pelleted by centrifugation at 7,500g for 1 min. The supernatant was diluted 20-fold in PLB and 15  $\mu$ L loaded into a well of a white flat bottom Costar 96 well plate (Corning). The assay was performed using a GloMax 96 microplate luminometer (Promega). The dual injectors were used to introduce 75  $\mu$ L of LUC assay reagent and Stop & Glo reagent, respectively, per well.

If the miRNA can bind to the target gene and regulate its expression, changes in *Firefly* LUC level will affect the dual LUC ratio, while controls consist of assays where the miRNA precursor culture was replaced with a precursor construct culture that does not match with the target sequence of interest. A significant reduction of dual LUC ratios compared with the controls is used to report and validate miRNA-target interactions. Statistical analysis was performed using GraphPad Prism 6 software.
