# Supplementary material for: Recent allopolyploidy alters Spartina microRNA expression in response to xenobiotic-induced stress
Source: Springer Nature journal article supplement (doi:10.1007/s11103-022-01328-y), 2022-12-29
Supplement: MOESM5 [file 11103_2022_1328_MOESM5_ESM.xlsx]

## Sheet: Feuil1
Spartina miRNAs	Arabidopsis miRNA primary transcript	Chr	start	stop	T-DNA lines	insertion	LP (5'→ 3')	RP (5'→ 3')
Spa-MIR156e; Spa-MIR156j	Ath-MIR156e	Chr5	3867210	3867312	FLAG_090F02	Exon	GGAAAAGAAATCAAGCATTCG	AGAAAGTTGCAGTTCACGTGG
					FLAG_104E09	Exon	GGAAAAGAAATCAAGCATTCG	AGAAAGTTGCAGTTCACGTGG
Spa-MIR159d	Ath-MIR159b	Chr1	6220646	6220841	SAIL_770_G05	Exon	GCAATAAAACTTGCTAAAGGGAG	TCCTTCCATTGGTTCTTTCTG
					SALKseq_030399.2	Exon	TCTGGATGCATCAAATAAGCC	CACTTTTGTTCTCCTCCTCCC
